# Supplementary material
Source: MDPI journal article supplement (https://www.mdpi.com/2073-4352/7/10/302)
Supplement: s1 [file s1]

Supporting Information

On Nucleation and Hydration: Testing the Waters

Ashit Rao, Denis Gebauer and Helmut Cölfen

**Figure S1.** Simulated speciation of glycine in relation to pH conditions performed by using Hyperquad simulation and speciation (HySS) [1], where Gly represents the anionic form.


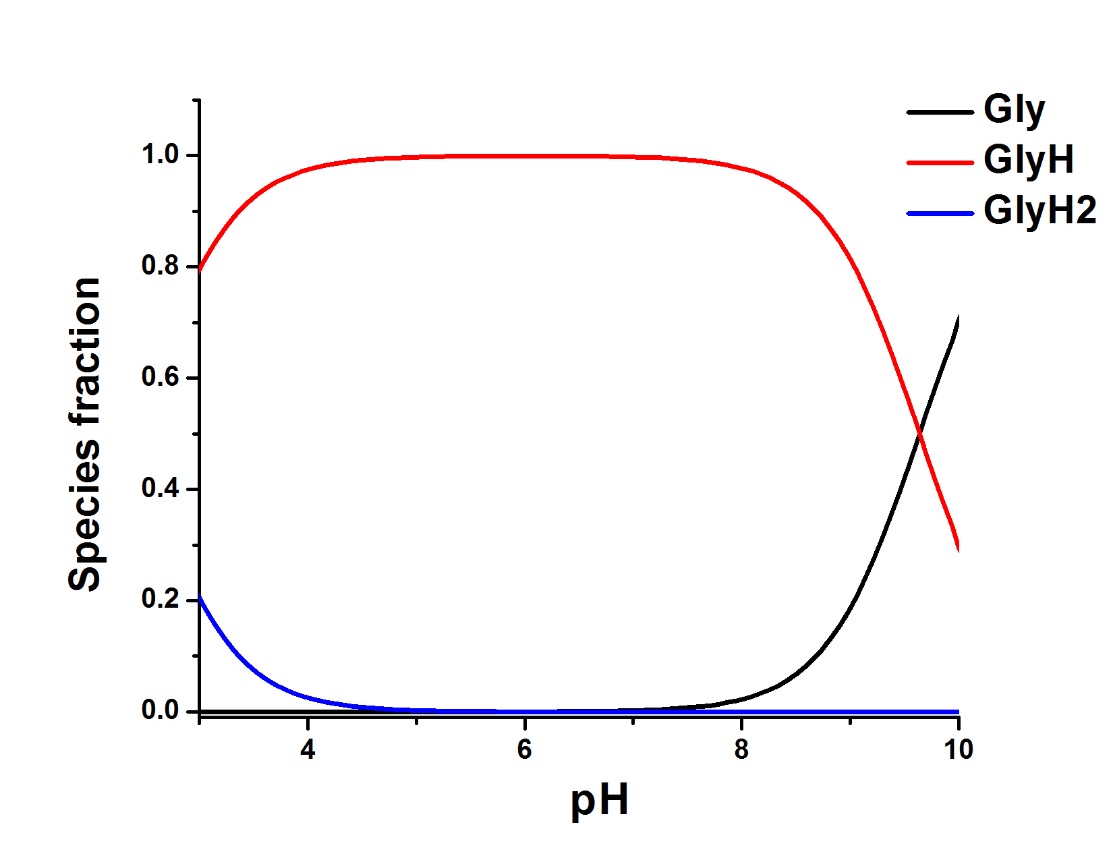


**Figure S2.** Representative scanning electron microscopy images of calcium carbonate particles formed via gas diffusion experiments conducted in the presence of different additives. Arrows denote vaterite spherulites. Reference experiments yielded rhombohedral particles typical of calcite.


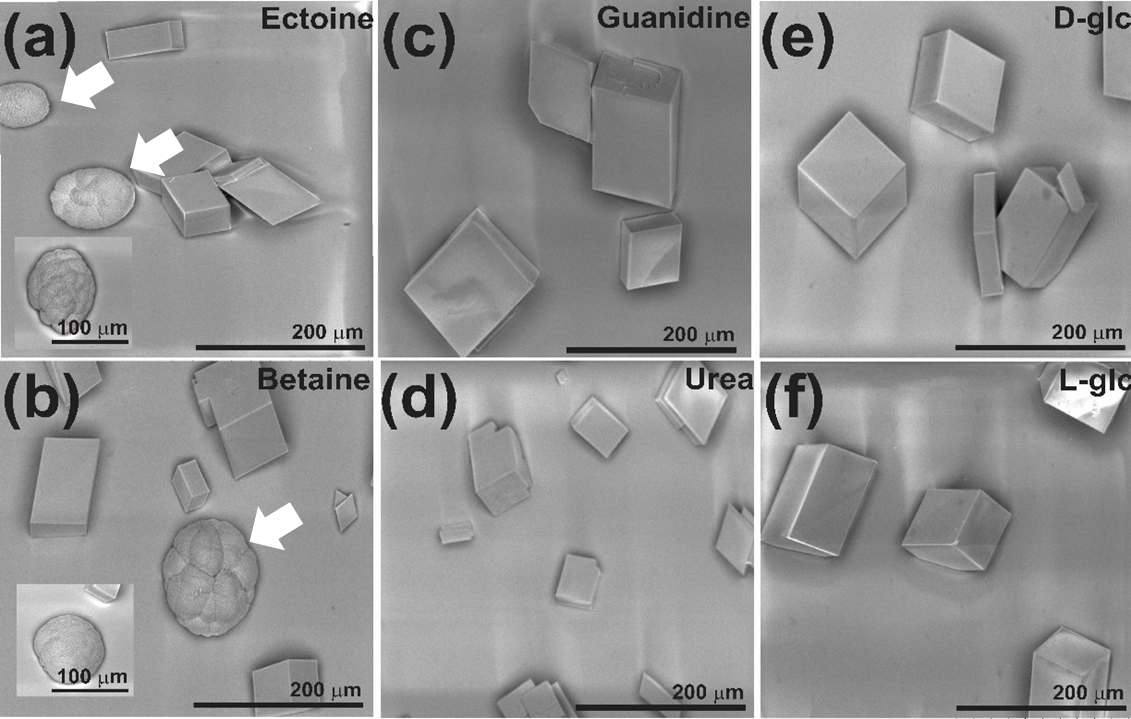


**Reference**

1. Alderighi, L.; Gans, P.; Ienco, A.; Peters, D.; Sabatini, A.; Vacca, A. Hyperquad simulation and speciation (HySS): a utility program for the investigation of equilibria involving soluble and partially soluble species. *Coord. Chem. Rev.* **1999**, *184*, 311–318.
